# Supplementary material for: A systematic computational investigation of the water splitting and N2 reduction reaction performances of monolayer MBenes
Source: Royal Society of Chemistry journal article supplement (doi:10.1039/d0cp06405j), 2021-01-01
Supplement: d0cp06405j1.pdf [file d0cp06405j1.pdf]

## Supporting Information

### **A systematic computational investigations of water splitting and N<sub>2</sub> reduction reaction performances of monolayer MBenes**

Yuwen Cheng,<sup>a,b</sup> Jisheng Mo,<sup>a</sup> Yongtao Li,<sup>a,\*</sup> Yumin Zhang,<sup>c</sup> Yan Song,<sup>d,\*</sup>

<sup>a</sup> School of Materials Science and Engineering, Anhui University of Technology, Maanshan  
243002, PR China

<sup>b</sup> Key Laboratory of Green Fabrication and Surface Technology of Advanced Metal Materials,  
Ministry of Education, Anhui University of Technology, Maanshan 243002, PR China

<sup>c</sup> National Key Laboratory of Science and Technology for National Defence on Advanced  
Composites in Special Environments, Harbin Institute of Technology, Harbin, 150001, PR China

<sup>d</sup> School of Materials Science and Engineering, Harbin Institute of Technology at Weihai, Weihai,  
264209, PR China

\*Corresponding Authors

E-mail: toni-li@163.com; sy@hitwh.edu.cn

## 1. Calculation methods of evaluating HER, OER and NRR activity

### 1.1 Hydrogen evolution reaction of MBenes

Under the standard conditions, the HER catalytic activity of materials can be evaluated by the change of the reaction Gibbs free energy of hydrogen adsorption ( $\Delta G_{H^*}$ ).  $\Delta G_{H^*}$  evaluated via eq (S1):

$$\Delta G_{H^*} = \Delta E_H + \Delta E_{ZPE} - T\Delta S_H \quad (S1)$$

Where  $\Delta E_H$ ,  $\Delta E_{ZPE}$  and  $\Delta S_H$  are the difference of hydrogen adsorption energy, zero-point energy and the entropy between adsorbed hydrogen and hydrogen in gas phase, respectively.

The  $\Delta S_H$  can be approximated by eq (S2)

$$\Delta S_H \cong -\frac{1}{2}S_{H_2}^0 \quad (S2)$$

due to the fact that the vibrational entropy in the adsorbed state is small according to previous study,<sup>1</sup> and  $S_{H_2}^0$  is the entropy of  $H_2$  gas under the standard condition.<sup>2</sup> Thus, eq (S1) can be written as eq (S3)

$$\begin{aligned} \Delta G_{H^*} &= \mu_{H^*} - \mu_{H^+} - \mu_e - \mu_* - \frac{1}{2}\mu_{H_2} - \mu_* \quad (S3) \\ &= (E_{H^*} + E_{ZPE(H^*)} - TS_{*H}) - \frac{1}{2}(E_{H_2} + E_{ZPE(H_2)} - TS_{H_2}) - (E_* + E_{ZPE(*)} - TS_*) \\ &= \Delta E_{(H^*)} + \Delta E_{ZPE(H^*)} - T\Delta S_{H^*} \end{aligned}$$

Here, the values of  $\Delta E_{ZPE}$  and  $T\Delta S$  are referred from Ref 5. The theoretical calculation overpotential is defined as  $\eta_{HER} = -|\Delta G_{H^*}|/e \times 10^3$  in unit of mV. The optimal  $\Delta G_{H^*}$  is 0 eV, therefore the ideal overpotential is 0 mV as well.<sup>3</sup>

### 1.2 Oxygen evolution reaction of MBenes

The proposed mechanism for OER consists of four intermediate steps under the standard conditions at electrode potential U, each step on the active sites releases of a proton and an electron.<sup>4</sup> The schematic of OER on MBenes is shown in Figure S4, it can be composed by four elementary steps, as follows:

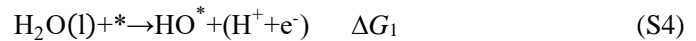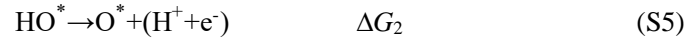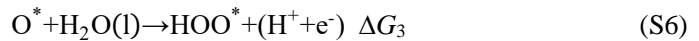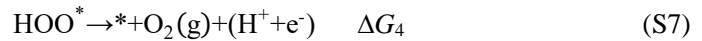

where  $O^*$ ,  $OH^*$ ,  $OOH^*$  are the adsorbed intermediates,  $*$  represents active sites on the catalyst surface, (l) and (g) refer to liquid and gas phases, respectively.  $\Delta G_1$ ,  $\Delta G_2$ ,  $\Delta G_3$  and  $\Delta G_4$  are the reaction Gibbs free energy of (S4)-(S7). The thermochemistry of these electrochemical reactions was obtained by using DFT calculations combined with SHE model developed by Nørskov and co-work.<sup>1</sup> Considering the ZPE and entropy corrections, the free energies of adsorption,  $\Delta G_{ads}$ , can be obtained by following equation:

$$\Delta G_{ads} = \Delta E + \Delta ZPE - T\Delta S \quad (S8)$$

For each step, the  $\Delta G$  is defined as the difference between free energies of the initial and final

states, and is given by the expression:

$$\Delta G = \Delta E + \Delta ZPE - T\Delta S + eU - \Delta G_{\text{pH}} \quad (\text{S9})$$

Where  $\Delta E$  is the change of the energy after adsorbed intermediate species,  $U$  is the potential at the electrode.  $T$  is the room temperature, which is equal to 298K.  $\Delta G_{\text{pH}}$  is the contributions of pH, which can be defined as  $\Delta G_{\text{pH}} = -k_{\text{B}}T \ln[\text{H}^+] = \text{pH} \times k_{\text{B}} \ln 10$ . The pH will not change the overpotential and thus only the pH = 0 is considered in this work. The values of  $\Delta E_{\text{ZPE}}$  and  $\Delta S$  of intermediates adsorbates ( $\text{O}^*$ ,  $\text{HO}^*$ ,  $\text{HOO}^*$ ) are referred from previous literature.<sup>5</sup> The theoretical onset overpotential  $\eta$ , which is determined by the potential limiting steps (PLS), can be obtained from the following equation.<sup>6,7</sup>

$$\eta = \max(\Delta G_1, \Delta G_2, \Delta G_3, \Delta G_4)/e - 1.23[\text{V}] \quad (\text{S10})$$

### 1.3 N<sub>2</sub> Reduction Reaction of MBenes

The calculations of the reaction Gibbs free energy ( $\Delta G$ ) of each elemental step was based on the computational hydrogen electrode model proposed by Nørskov and coauthors,<sup>7,8</sup> which can be calculated by:

$$\Delta G = \Delta E_{\text{DFT}}^{\text{NRR}} + \Delta ZPE - T\Delta S + eU - \Delta G_{\text{pH}} \quad (\text{S10})$$

The  $\Delta E_{\text{ZPE}}$  and  $\Delta S$  are the difference of zero point energy and the difference of entropy between the adsorbed state and the free-standing state, respectively, which are referenced the latest works about NRR.<sup>9-11</sup> The calculated values of zero point energy and the entropy are derived from the previous work.<sup>9</sup> The adsorption energy ( $\Delta E_{\text{DFT}}$ ) of different intermediates is calculated by

$$\Delta E_{\text{DFT}} = E_{\text{total}} - (E_{\text{catal}} + E_{\text{adsorp}}) \quad (\text{S11})$$

where  $E_{\text{total}}$  and  $E_{\text{catal}}$  are the total energies of the slab with and without intermediates.  $E_{\text{adsorp}}$  is the total energy of an isolate intermediate, such as  $^*\text{N}_2$  and  $^*\text{NNH}$ . The  $\eta_{\text{onset}}$  is determined by the potential limiting steps (PLS), corresponding to the most positive reaction Gibbs free energy ( $\Delta G_{\text{max}}$ ), and can be calculated by:  $U_{\text{onset}} = -\Delta G_{\text{max}}/e$ . Therefore, the calculated overpotential  $\eta_{\text{NRR}}$  can be computed via  $\eta_{\text{NRR}} = U_{\text{equilibrium}} - U_{\text{onset}}$ . Thus, the overpotential under a given pH ( $\eta$ ) will be:

$$\eta_{\text{NRR}} = U_{\text{equilibrium}} - U_{\text{onset}} = \Delta G_{\text{max}}/e \quad (\text{S12})$$

### 1.4 formation energy of MBenes

The formation energy of MBenes is obtained via eq (S14)

$$E_{\text{f}} = E_{\text{MB}} - nE_{\text{M}} - mE_{\text{B}}/m+n \quad (\text{S13})$$

Where the  $E_{\text{f}}$ ,  $E_{\text{M}}$ ,  $E_{\text{B}}$  are the total energy of MBene, the total energy of isolated metal, and the total energy of isolated B atom, respectively.  $n$  and  $m$  are the number of metal and B atoms in MBenes, respectively.

## 2. Figures and tables

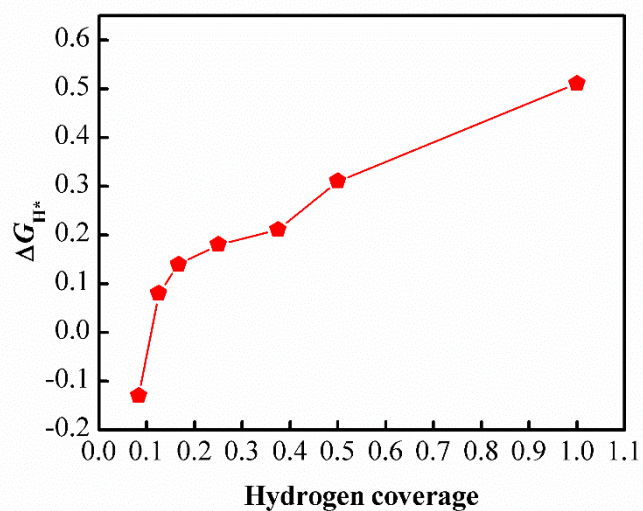

**Figure S1.** The reactions Gibbs free energies ( $\Delta G_{H^*}$ ) (eV) of hydrogen of NiB-B at different hydrogen coverage ( $\theta_H$ ).

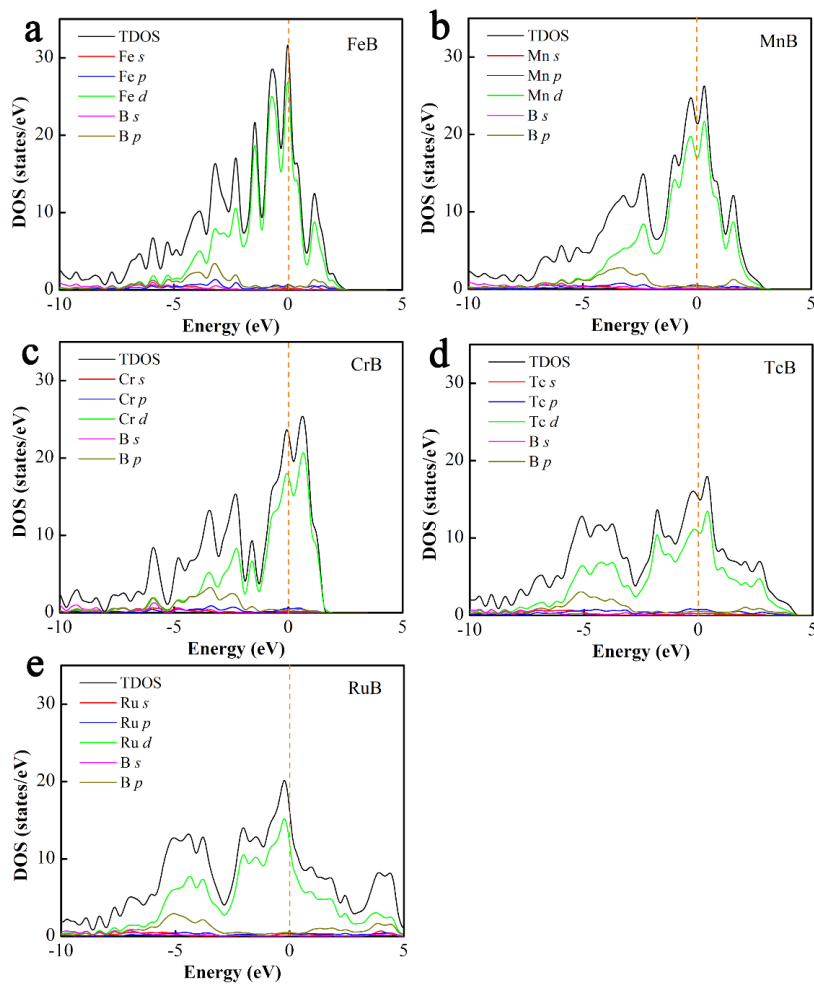

**Figure S2.** Density of states of MBenes. (a) FeB, (b) MnB, (c) CrB, (d) TcB, and (e) RuB.

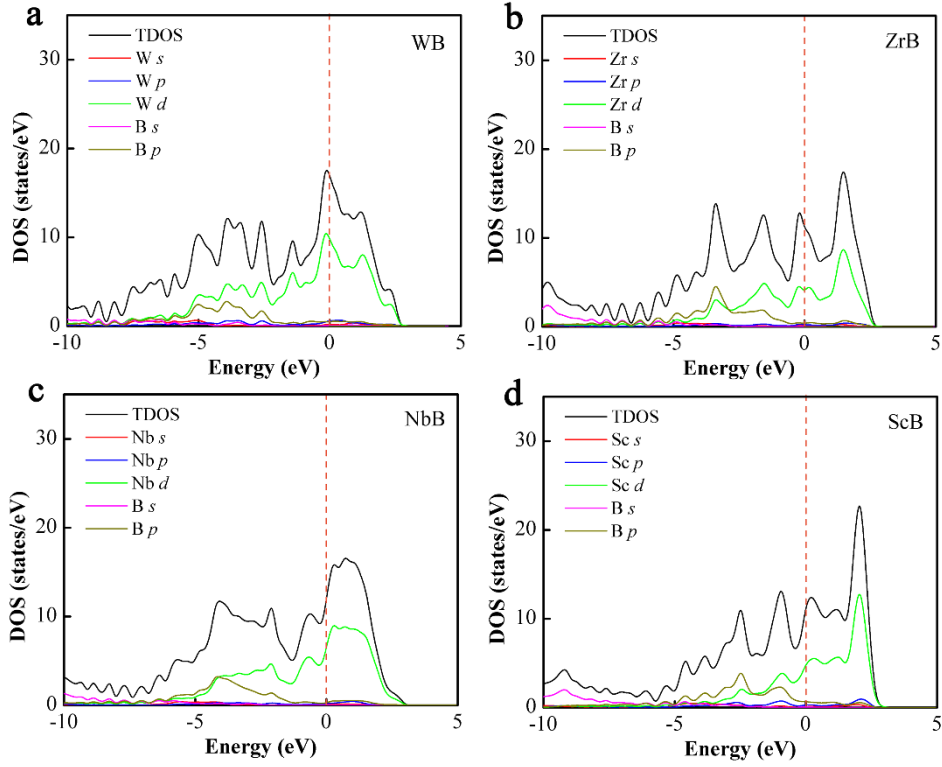

**Figure S3.** Density of states of MBenes. (a) WB, (b) ZrB, (c) NbB, and (d) ScB.

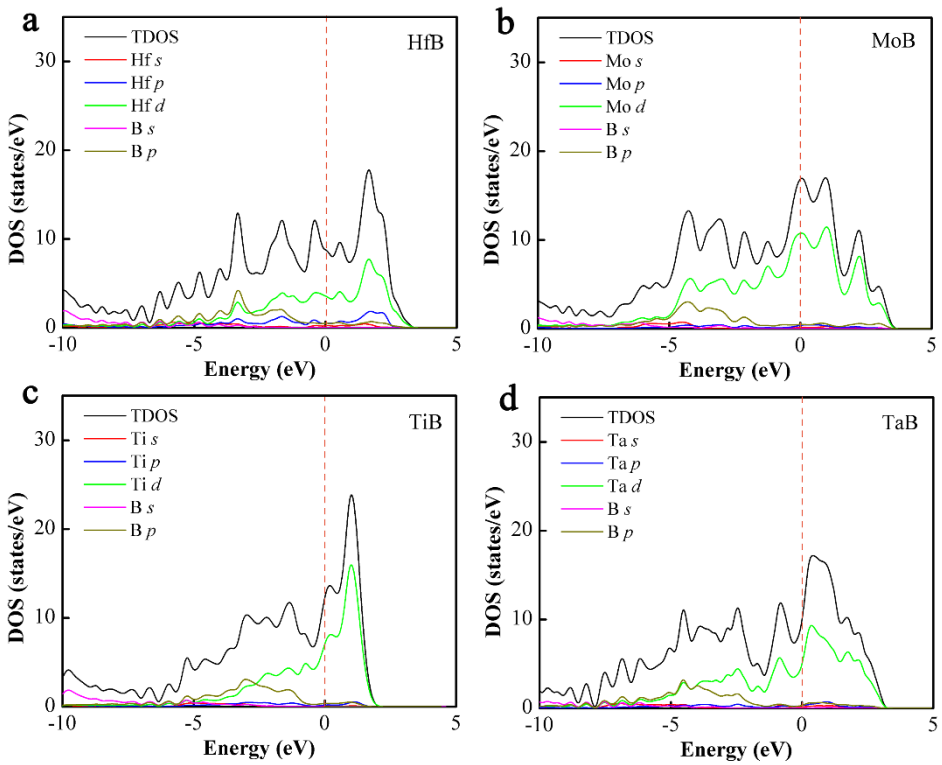

**Figure S4.** Density of states of MBenes. (a) HfB, (b) MoB, (c) TiB, (d) TcB, and (e) TaB.

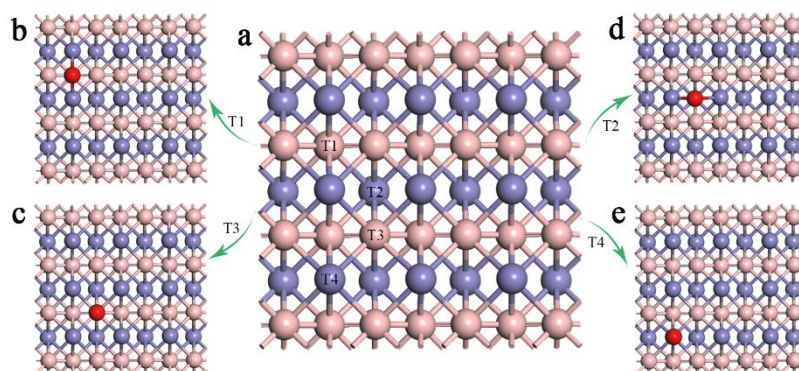

**Figure S5.** Schematic structure of MBenes with oxygen terminal. (a) Lattice structure of MBenes, MBenes with oxygen occupied on (b) T1 site, (c) T3 site, (d) T2 site, and (e) T4 site.

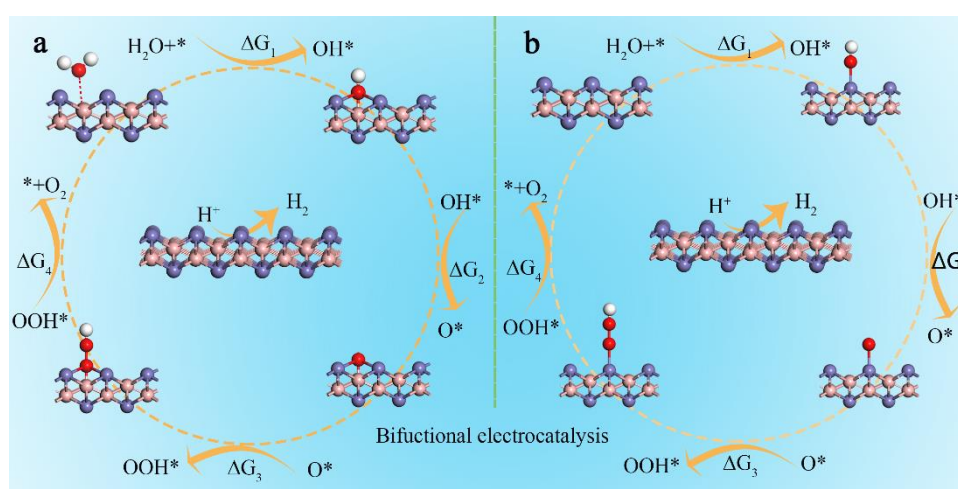

**Figure S6.** Schematic of MB-O\* as bifunctional catalyst for overall water splitting. Elementary reaction structures of OER and HER at (a) B site and (b) metal site of MB surface. The adsorbed states for reactions include \*H, \*O, \*OH, and \*OOH species.

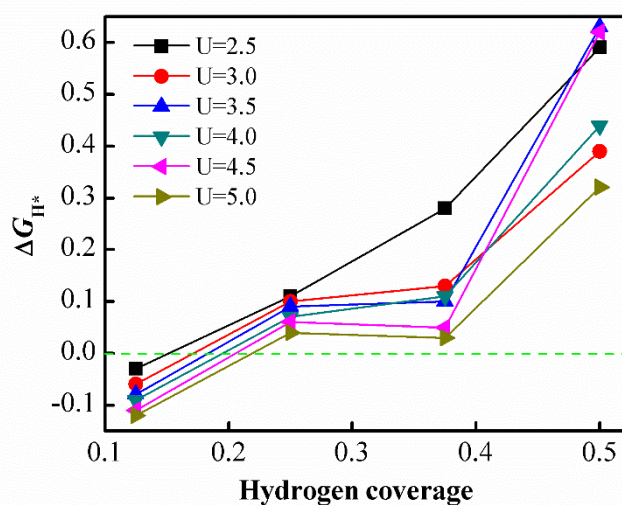

**Figure S7.** The reaction Gibbs free energy of hydrogen adsorption with considering Hubbard U

correction.

**Table S1.** The lattice parameters of bulk MAIB and  $M_2AlB_2$ , and bond lengths of M-B and M-Al bonds (M= Fe, Mn, Cr, Ni, Ru, Tc, Hf, Mo, Ta, Ti, W, Zr, Nb, and Sc).

| MAIB                             | $a(\text{\AA})$ | $b(\text{\AA})$ | $c(\text{\AA})$ | $b/a$ | $d_{M-B}(\text{\AA})$ | $d_{M-Al}(\text{\AA})$ |
|----------------------------------|-----------------|-----------------|-----------------|-------|-----------------------|------------------------|
| Fe <sub>2</sub> AlB <sub>2</sub> | 2.917           | 11.010          | 2.833           | 3.774 | 2.151,2.139           | 2.593                  |
| Mn <sub>2</sub> AlB <sub>2</sub> | 2.906           | 11.021          | 2.841           | 3.792 | 2.138,2.168           | 2.589                  |
| Cr <sub>2</sub> AlB <sub>2</sub> | 2.922           | 11.093          | 2.916           | 3.796 | 2.161, 2.179          | 2.637                  |
| Ni <sub>2</sub> AlB <sub>2</sub> | 2.968           | 10.959          | 2.892           | 3.692 | 2.181,2.219           | 2.574                  |
| Ru <sub>2</sub> AlB <sub>2</sub> | 2.921           | 11.821          | 3.595           | 4.046 | 2.507,2.609           | 2.775                  |
| Tc <sub>2</sub> AlB <sub>2</sub> | 2.973           | 11.615          | 3.415           | 3.906 | 2.412,2.490           | 2.761                  |
| HfAlB                            | 3.444           | 15.549          | 3.158           | 4.514 | 2.519                 | 2.938                  |
| MoAlB                            | 3.217           | 14.057          | 3.109           | 4.369 | 2.372                 | 2.713                  |
| TaAlB                            | 3.336           | 14.698          | 3.094           | 4.405 | 2.434                 | 2.807                  |
| TiAlB                            | 3.277           | 14.683          | 3.061           | 4.481 | 2.378                 | 2.779                  |
| WAlB                             | 3.223           | 14.006          | 3.121           | 4.332 | 2.373                 | 2.717                  |
| ZrAlB                            | 3.479           | 15.832          | 3.171           | 4.550 | 2.558                 | 2.984                  |
| NbAlB                            | 3.341           | 14.709          | 3.116           | 4.402 | 2.440                 | 2.816                  |
| ScAlB                            | 3.567           | 14.672          | 3.196           | 4.113 | 2.542                 | 2.975                  |

**Table S2.** The exfoliation energy ( $E_{xf}$ ) of MAIB ( $M_2AlB_2$ ) exfoliated into MBenes and the bonding energy ( $E_{b-Al}$ ) of Al with MB in MAIB.

| System                           | $E_{xf}(\text{eV}/\text{\AA}^2)$ | $E_{b-Al}(\text{eV})$ |
|----------------------------------|----------------------------------|-----------------------|
| Fe <sub>2</sub> AlB <sub>2</sub> | 0.185                            | -2.89                 |
| Mn <sub>2</sub> AlB <sub>2</sub> | 0.188                            | -3.21                 |
| Cr <sub>2</sub> AlB <sub>2</sub> | 0.224                            | -3.17                 |
| Ni <sub>2</sub> AlB <sub>2</sub> | 0.123                            | -1.81                 |
| Ru <sub>2</sub> AlB <sub>2</sub> | 0.145                            | -1.89                 |
| Tc <sub>2</sub> AlB <sub>2</sub> | 0.187                            | -1.49                 |
| HfAlB                            | 0.238                            | -3.91                 |
| MoAlB                            | 0.419                            | -8.11                 |
| TaAlB                            | 0.368                            | -6.49                 |
| TiAlB                            | 0.329                            | -6.23                 |
| WAlB                             | 0.428                            | -8.27                 |
| ZrAlB                            | 0.195                            | -4.03                 |
| NbAlB                            | 0.354                            | -6.61                 |
| ScAlB                            | 0.186                            | -3.09                 |

**Table S3.** Average valence electrons of Metal, Al, and B atoms in MAIB systems based on the Bader charge analysis.

| System                           | Metal ( $e$ ) | Al ( $e$ ) | B ( $e$ ) |
|----------------------------------|---------------|------------|-----------|
| Fe <sub>2</sub> AlB <sub>2</sub> | -0.28         | +3         | -1.22     |
| Mn <sub>2</sub> AlB <sub>2</sub> | -0.43         | +3         | -1.07     |
| Cr <sub>2</sub> AlB <sub>2</sub> | -0.09         | +3         | -1.41     |

|                                  |       |       |       |
|----------------------------------|-------|-------|-------|
| Ni <sub>2</sub> AlB <sub>2</sub> | -0.77 | +3    | -0.73 |
| Ru <sub>2</sub> AlB <sub>2</sub> | -1.28 | +3    | -0.44 |
| Tc <sub>2</sub> AlB <sub>2</sub> | -0.87 | +3    | -0.62 |
| HfAlB                            | +0.31 | +1.41 | -1.72 |
| MoAlB                            | -1.09 | +2.17 | -1.08 |
| TaAlB                            | -0.23 | +1.93 | -1.70 |
| TiAlB                            | +1.13 | +2.71 | -1.58 |
| WAlB                             | -1.91 | +3    | -1.09 |
| ZrAlB                            | +0.95 | +0.93 | -1.88 |
| NbAlB                            | -0.14 | +1.86 | -1.72 |
| ScAlB                            | -0.87 | +2.75 | -1.88 |

**Table S4.** The electronic character and formation energy of MBenes (M= Fe, Mn, Cr, Ni, Ru, Tc, Hf, Mo, Ta, Ti, W, Zr, Nb, and Sc).

| MB  | Metallic | $E_f$ |
|-----|----------|-------|
| FeB | Yes      | -1.42 |
| MnB | Yes      | -1.21 |
| CrB | Yes      | -1.12 |
| NiB | Yes      | -0.81 |
| RuB | Yes      | -1.45 |
| TcB | Yes      | -1.29 |
| HfB | Yes      | -1.58 |
| MoB | Yes      | -1.06 |
| TaB | Yes      | -1.26 |
| TiB | Yes      | -1.66 |
| WB  | Yes      | -0.77 |
| ZrB | Yes      | -1.70 |
| NbB | Yes      | -1.45 |
| ScB | Yes      | -1.72 |

**Table S5.** Relative energy (eV) of terminal oxygen occupied at different sites of MBO and terminal oxygen bonding energy ( $E_{b-O}$ ) of MBO.

| System | T1 (bottom B) | T2 (bottom metal) | T3 (top metal) | T4 (top B) | $E_{b-O}$ (eV) |
|--------|---------------|-------------------|----------------|------------|----------------|
| FeB-O* | -1.14         | -1.81             | -1.46          | -2.09      | -2.57          |
| MnBO*  | -1.22         | 18.54             | -36.25         | -38.98     | -3.03          |
| CrB-O* | -3.04         | -1.52             | -1.99          | -3.42      | -3.15          |
| NiB-O* | -1.89         | -11.64            | 5.65           | -28.86     | -2.71          |
| RuB-O* | -1.11         | -22.13            | 92.37          | -41.54     | -3.24          |
| TcB-O* | -1.45         | -19.91            | 83.54          | -38.08     | -3.13          |
| MoB-O* | -1.19         | -2.18             | 0.55           | -1.68      | -3.64          |
| NbB-O* | -2.65         | 1.17              | -22.08         | -17.68     | -4.39          |
| ScB-O* | -5.33         | -1.74             | -83.21         | -32.61     | -5.46          |



**Table S6.** The reactions Gibbs free energies ( $\Delta G$ ) (eV) of hydrogen on MBO surface at different hydrogen coverage ( $\theta_H$ ).

| System | $\theta_H=0.125$ | $\theta_H=0.25$ | $\theta_H=0.375$ | $\theta_H=0.50$ |
|--------|------------------|-----------------|------------------|-----------------|
| FeBO   | -0.87            | -1.24           | -0.37            | 0.69            |
| MnBO   | -0.71            | 0.56            | 0.79             | 0.84            |
| CrBO   | 0.08             | -0.49           | -0.07            | 0.35            |
| NiBO   | 0.16             | 0.73            | -0.94            | 0.68            |
| RuBO   | -0.37            | 0.53            | -0.09            | -0.32           |
| TcBO   | -1.37            | -0.87           | -1.08            | 0.65            |
| MoBO   | -0.47            | -0.61           | -0.45            | -0.29           |
| NbBO   | 1.25             | 2.15            | -1.41            | 2.43            |
| ScBO   | 0.46             | 0.74            | 0.91             | 1.28            |

**Table S7.** The reactions Gibbs free energies ( $\Delta G_{1-4}$ ) of four elementary steps on B site of MBenes. The data are bold faced representing the potential limiting steps ( $\Delta G_{\max}$ ).

| System | $\Delta G_1$ | $\Delta G_2$ | $\Delta G_3$ | $\Delta G_4$ |
|--------|--------------|--------------|--------------|--------------|
| FeB-B  | 0.22         | 0.06         | 3.01         | 1.63         |
| MnB-B  | 0.91         | -0.77        | 2.84         | 1.94         |
| CrB-B  | -1.12        | 0.52         | 2.59         | 2.93         |
| NiB-B  | -0.47        | -0.40        | 3.59         | 2.20         |
| RuB-B  | -0.32        | -2.08        | -1.29        | 8.61         |
| TcB-B  | -2.19        | 0.61         | -0.46        | 6.96         |
| HfB-B  | -0.61        | 0.28         | 3.36         | 1.89         |
| MoB-B  | -1.08        | 0.65         | -0.63        | 5.98         |
| TaB-B  | -2.75        | 0.04         | -2.83        | 10.46        |
| TiB-B  | -0.09        | -1.92        | 3.96         | 2.97         |
| WB-B   | -1.43        | -2.12        | 0.48         | 7.99         |
| ZrB-B  | -3.09        | 2.19         | -1.90        | 7.72         |
| NbB-B  | -0.87        | -0.58        | -0.89        | 7.26         |
| ScB-B  | -1.45        | -1.16        | -0.32        | 7.85         |

**Table S8.** The reactions Gibbs free energies ( $\Delta G_{1-4}$ ) of four elementary steps on metal site of MBenes.

| System | $\Delta G_1$ | $\Delta G_2$ | $\Delta G_3$ | $\Delta G_4$ |
|--------|--------------|--------------|--------------|--------------|
| FeB-Fe | 0.47         | 0.48         | 3.52         | 0.45         |
| MnB-Mn | 0.14         | 0.35         | 3.10         | 1.33         |
| CrB-Cr | -0.71        | 0.61         | 3.32         | 1.70         |
| NiB-Ni | 0.21         | 1.53         | 1.60         | 1.58         |
| RuB-Ru | 0.17         | 1.55         | 3.22         | -0.02        |
| TcB-Tc | -0.08        | 0.48         | 2.86         | 1.66         |
| HfB-Hf | -0.72        | -1.14        | 4.80         | 1.98         |
| MoB-Mo | -0.74        | -0.21        | 3.24         | 2.63         |
| TaB-Ta | -2.76        | -0.02        | -2.05        | 9.75         |
| TiB-Ti | -1.06        | 0.31         | 3.84         | 1.83         |

|        |       |       |      |       |
|--------|-------|-------|------|-------|
| WB-W   | -1.04 | -0.29 | 3.60 | 2.65  |
| ZrB-Zr | -8.64 | 6.91  | 3.59 | 10.24 |
| NbB-Nb | -0.93 | -0.29 | 1.19 | 4.95  |
| ScB-Sc | -1.14 | -0.49 | 3.95 | 2.60  |

**Table S9.** The NRR overpotential (V) of end-on (via alternating and distal mechanism) and side-on (via enzymatic and consecutive mechanism) configurations on B site of MBenes.

| System | Alternating | Distal | Enzymatic | Consecutive |
|--------|-------------|--------|-----------|-------------|
| FeB-B  | 1.10        | 1.10   | 0.42      | 0.77        |
| MnB-B  | 0.41        | 0.41   | 0.55      | 0.71        |
| CrB-B  | 0.76        | 0.49   | 0.39      | 0.20        |
| NiB-B  | 1.07        | 0.68   | 1.30      | 1.70        |
| RuB-B  | 0.67        | 0.57   | 0.71      | 0.60        |
| TcB-B  | 0.81        | 0.77   | 1.25      | 1.35        |
| HfB-B  | 1.31        | 1.54   | 1.72      | 1.54        |
| MoB-B  | 1.22        | 1.22   | 0.27      | 0.80        |
| TaB-B  | 1.49        | 1.60   | 1.74      | 0.28        |
| TiB-B  | 1.25        | 1.00   | 1.36      | 1.50        |
| WB-B   | 1.68        | 1.28   | 0.65      | 0.51        |
| ZrB-B  | 0.67        | 0.80   | 1.56      | 0.80        |
| NbB-B  | 1.19        | 0.82   | 0.70      | 0.36        |
| ScB-B  | 0.99        | 0.66   | 0.55      | 0.66        |

**Table S10.** The NRR overpotential (V) of end-on (via alternating and distal mechanism) and side-on (via enzymatic and consecutive mechanism) configurations on metal site of MBenes.

| System | Alternating | Distal | Enzymatic | Consecutive |
|--------|-------------|--------|-----------|-------------|
| FeB-Fe | 0.11        | 0.37   | 1.15      | 1.32        |
| MnB-Mn | 0.31        | 0.85   | 0.86      | 0.86        |
| CrB-Cr | 0.56        | 0.60   | 0.28      | 0.60        |
| NiB-Ni | 1.65        | 1.65   | 1.50      | 1.50        |
| RuB-Ru | 1.18        | 1.18   | 0.54      | 0.33        |
| TcB-Tc | 1.37        | 1.54   | 1.38      | 1.79        |
| HfB-Hf | 0.85        | 0.51   | 1.72      | 1.39        |
| MoB-Mo | 0.76        | 0.76   | 0.50      | 0.50        |
| TaB-Ta | 1.50        | 1.50   | 0.88      | 0.96        |
| TiB-Ti | 0.96        | 0.96   | 0.75      | 0.75        |
| WB-W   | 0.55        | 0.55   | 0.63      | 1.49        |
| ZrB-Zr | 1.61        | 0.82   | 1.44      | 1.03        |
| NbB-Nb | 0.93        | 0.33   | 0.61      | 1.11        |
| ScB-Sc | 1.06        | 1.06   | 1.63      | 0.83        |

## References

- 1 Nørskov, J. K.; Bligaard, T.; Logadottir, A.; Kitchin, J.; Chen, J.; Pandelov, S.; Stimming, U. Trends in the Exchange Current for Hydrogen Evolution. *J. Electrochem. Soc.* 2005, 152,

J23–J26.

- 2 Atkins, P. *Physical Chemistry*, 10th ed. Oxford University Press: Oxford, U.K. 2014.
- 3 Cheng, Y.; Dai, J.; Zhang, Y.; Song, Y. Two-Dimensional, Ordered, Double Transition Metal Carbides (MXenes): A New Family of Promising Catalysts for the Hydrogen Evolution Reaction. *J. Phys. Chem. C* 2018, 122, 28113–28122.
- 4 Xiao, W.; Huang, X. L.; Song, W. D.; Yang, Y.; Heng, T. S.; Xue, J. M.; Feng, Y. P.; Ding, J. High Catalytic Activity of Oxygen-Induced (200) Surface of Ta<sub>2</sub>O<sub>5</sub> Nanolayer Towards Durable Oxygen Evolution Reaction. *Nano Energy*. 2016, 25, 60–67.
- 5 Li, M. T.; Zhang, L. P.; Xu, Q.; Niu, J. B.; Xia, Z. H. N-Doped Graphene as Catalysts for Oxygen Reduction and Oxygen Evolution Reactions: Theoretical Considerations. *J. Catal.* 2014, 314, 66–72.
- 6 Bajdich, M. M.; Mota, G.; Vojvodic, A.; Nørskov, J. K.; Bell, A. T. Theoretical Investigation of the Activity of Cobalt Oxides for the Electrochemical Oxidation of Water. *J. Am. Chem. Soc.* 2013, 135, 13521–13530.
- 7 Cheng, Y.; Dai, J.; Song, Y.; Zhang, Y. Nanostructure of Cr<sub>2</sub>CO<sub>2</sub> MXene Supported Single Metal Atom as an Efficient Bifunctional Electrocatalyst for Overall Water Splitting. *ACS Appl. Energy Mater.* 2019, 2, 6851–6859.
- 8 Rossmeisl, J.; Logadottir, A.; Nørskov, J. K. Electrolysis of Water on (Oxidized) Metal Surfaces. *Chem. Phys.* 2005, 319, 178–184.
- 9 Peterson, A. A.; Abild-Pedersen, F.; Studt, F.; Rossmeisl, J.; Nørskov, J. K. How Copper Catalyzes the Electroreduction of Carbon Dioxide into Hydrocarbon Fuels. *Energy Environ. Sci.* 2010, 3, 1311–1315.
- 10 Ling, C. Y.; Bai, X. W.; Ouyang, Y. X.; Du, A. J.; Wang, J. L. Single Molybdenum Atom Anchored on N-Doped Carbon as a Promising Electrocatalyst for Nitrogen Reduction into Ammonia at Ambient Conditions. *J. Phys. Chem. C* 2018, 122, 16842–16847.
- 11 Gao, Y. J.; Zhuo, Han.; Cao, Y. Y.; Sun, X.; Zhuang, G. L.; Deng, S. W.; Zhong, X.; Wei, Z. H.; Wang, J. G. A Theoretical Study of Electrocatalytic Ammonia Synthesis on Single Metal Atom/MXene. *Chin. J. Catal.* 2019, 40, 152–159.
- 12 Ling, C. Y.; Niu, X. H.; Li, Q.; Du, A. J.; Wang, J. L. Metal-Free Single Atom Catalyst for N<sub>2</sub> Fixation Driven by Visible Light. *J. Am. Chem. Soc.* 2018, 140, 14161–14168.
